# Supplementary material
Source: PubMed Central journal article supplement (PMC3907463)
Supplement: NIHMS512101-supplement-Supp_Data_S1.pdf [file NIHMS512101-supplement-Supp_Data_S1.pdf]

28  $\Delta$ luxCDABEG

63.3

20

116.7

10

43.3

63.3

10

85

2430

10

26.7

236.7

80

| Day 1 wild typ | 1 ΔluxCDAE | Day 3 wild typ | 3 ΔluxCDAE | Day 7 wild typ | 7 ΔluxCDAE | Day 11 wild typ | 11 ΔluxCDAE | Day 15 wild typ |
|----------------|------------|----------------|------------|----------------|------------|-----------------|-------------|-----------------|
| 60500          | 62000      | 96000          | 11000      | 528000         | 1000       | 500000          | 500         | 780000          |
| 67500          | 30500      | 114000         | 2000       | 625000         | 35000      | 295000          | 2000        | 396500          |
| 173500         | 67000      | 125000         | 11000      | 98000          | 10000      | 580000          | 6500        | 1167500         |
| 40500          | 50000      | 70000          | 22000      | 182000         | 1000       | 1950000         | 500         | 1420000         |
| 68000          | 62000      | 566000         | 74000      | 770000         | 1000       | 458000          | 500         | 1767500         |
| 105000         | 41500      | 29000          | 8000       | 700000         | 1000       | 1680000         | 500         | 810000          |
| 51500          | 59500      | 34000          | 33000      | 431000         | 1000       | 268000          | 500         | 1597500         |
| 57000          | 99000      | 35000          | 1000       | 674000         | 1000       | 458000          | 500         | 3737500         |
| 83500          | 70500      | 332000         | 28000      | 41000          | 6330       | 903000          | 500         | 736500          |
| 33000          | 147000     | 28000          | 25000      | 38000          | 7000       | 116000          | 500         | 2802500         |
| 87000          | 200000     | 19500          | 14000      | 120500         | 1000       | 566500          | 1000        | 2760000         |
| 95500          | 500        | 100000         | 59000      | 31000          | 500        | 288000          | 1000        | 1090000         |
| 81000          | 38000      | 80000          | 110000     | 186500         | 500        | 71000           | 1000        | 2600000         |
| 91000          | 92000      | 235000         | 15000      | 79000          | 500        | 436500          | 1000        | 1320000         |
| 51000          | 63000      | 95000          | 23000      | 234000         | 1000       | 980000          | 8000        | 920000          |
| 37000          | 176000     | 40000          | 24000      | 213000         | 500        | 1063500         | 1000        | 1530000         |
| 44000          | 104000     | 295000         | 55000      | 348500         | 4000       | 1326500         | 1000        | 630000          |
| 93000          | 133000     | 91000          | 72000      | 382500         | 2500       | 250000          | 1000        | 990000          |
| 31000          | 110000     | 27000          | 146000     | 446000         | 500        | 986500          | 1000        | 2880000         |
| 76000          | 35000      | 96000          | 13000      | 819000         | 1000       | 2053500         | 3000        | 1970000         |

15  $\Delta$ luxCDABEG

500

500

2500

2500

2500

3325

2500

2500

500

2500

500

500

500

500

500

500

500

500

500

500

| Day 1 wild typ | 1 ΔluxCDAE | Day 3 wild typ | 3 ΔluxCDAE | Day 7 wild typ | 7 ΔluxCDAE | Day 11 wild typ | 11 ΔluxCDAE | Day 15 wild typ |
|----------------|------------|----------------|------------|----------------|------------|-----------------|-------------|-----------------|
| 60500          | 62000      | 96000          | 11000      | 528000         | 1000       | 500000          | 500         | 780000          |
| 67500          | 30500      | 114000         | 2000       | 625000         | 35000      | 295000          | 2000        | 396500          |
| 173500         | 67000      | 125000         | 11000      | 98000          | 10000      | 580000          | 6500        | 1167500         |
| 40500          | 50000      | 70000          | 22000      | 182000         | 1000       | 1950000         | 500         | 1420000         |
| 68000          | 62000      | 566000         | 74000      | 770000         | 1000       | 458000          | 500         | 1767500         |
| 105000         | 41500      | 29000          | 8000       | 700000         | 1000       | 1680000         | 500         | 810000          |
| 51500          | 59500      | 34000          | 33000      | 431000         | 1000       | 268000          | 500         | 1597500         |
| 57000          | 99000      | 35000          | 1000       | 674000         | 1000       | 458000          | 500         | 3737500         |
| 83500          | 70500      | 332000         | 28000      | 41000          | 6330       | 903000          | 500         | 736500          |
| 33000          | 147000     | 28000          | 25000      | 38000          | 7000       | 116000          | 500         | 2802500         |
| 87000          | 200000     | 19500          | 14000      | 120500         | 1000       | 566500          | 1000        | 2760000         |
| 95500          | 500        | 100000         | 59000      | 31000          | 500        | 288000          | 1000        | 1090000         |
| 81000          | 38000      | 80000          | 110000     | 186500         | 500        | 71000           | 1000        | 2600000         |
| 91000          | 92000      | 235000         | 15000      | 79000          | 500        | 436500          | 1000        | 1320000         |
| 51000          | 63000      | 95000          | 23000      | 234000         | 1000       | 980000          | 8000        | 920000          |
| 37000          | 176000     | 40000          | 24000      | 213000         | 500        | 1063500         | 1000        | 1530000         |
| 44000          | 104000     | 295000         | 55000      | 348500         | 4000       | 1326500         | 1000        | 630000          |
| 93000          | 133000     | 91000          | 72000      | 382500         | 2500       | 250000          | 1000        | 990000          |
| 31000          | 110000     | 27000          | 146000     | 446000         | 500        | 986500          | 1000        | 2880000         |
| 76000          | 35000      | 96000          | 13000      | 819000         | 1000       | 2053500         | 3000        | 1970000         |

15  $\Delta$ luxCDABEG

500

500

2500

2500

2500

3325

2500

2500

500

2500

500

500

500

500

500

500

500

500

500

500
