# Supplementary material
Source: PubMed Central journal article supplement (PMC3907463)

Figure S1

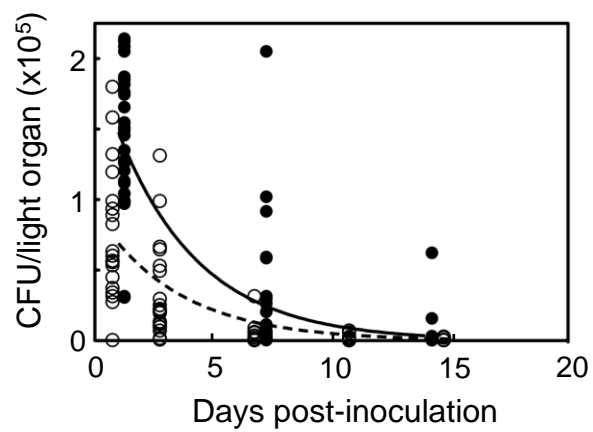

Supplement: NIHMS512101-supplement-Supp_Fig_S1.pdf [file NIHMS512101-supplement-Supp_Fig_S1.pdf]

Figure S2

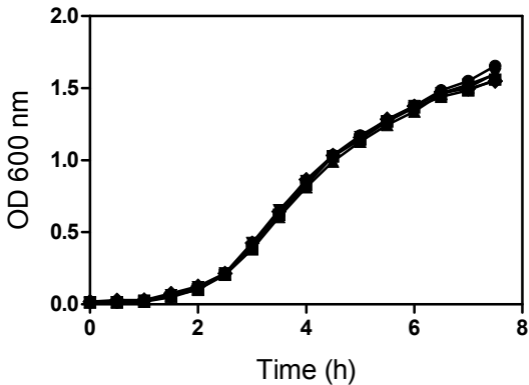

Supplement: NIHMS512101-supplement-Supp_Fig_S2.pdf [file NIHMS512101-supplement-Supp_Fig_S2.pdf]
